# Supplementary material for: Polymeric and inorganic sorbents as a green option to recover critical raw materials at trace levels from sea saltwork bitterns
Source: Royal Society of Chemistry journal article supplement (doi:10.1039/d2gc02338e), 2023-01-01
Supplement: d2gc02338e1.pdf [file d2gc02338e1.pdf]

## Supplementary information

*Table S1. Measurement of the pH of the bitterns after sorption stage with polymeric sorbents (1 h in contact with the sorbents).*

| Functional group                               | Sorbent     | pH                             |                                   |                                   |
|------------------------------------------------|-------------|--------------------------------|-----------------------------------|-----------------------------------|
|                                                |             | Bittern 1<br>With Ca and<br>Mg | Bittern 2<br>Without Ca<br>and Mg | Bittern 3<br>Low<br>concentration |
| Tertiary amine                                 | IRA94       | 8.74 ± 0.33                    | 9.02 ± 0.00                       | 8.82 ± 0.08                       |
|                                                | MP62        | 9.60 ± 0.21                    | 9.73 ± 0.05                       | 9.96 ± 0.03                       |
|                                                | A100        | 9.19 ± 0.04                    | 9.19 ± 0.03                       | 9.17 ± 0.00                       |
| Quaternary amine                               | A500Plus    | 7.17 ± 0.00                    | 7.22 ± 0.01                       | 7.25 ± 0.04                       |
|                                                | MP500       | 7.87 ± 0.03                    | 7.88 ± 0.02                       | 7.91 ± 0.02                       |
|                                                | K6362       | 6.95 ± 0.07                    | 7.00 ± 0.07                       | 7.02 ± 0.01                       |
|                                                | IRA904      | 6.61 ± 0.28                    | 6.73 ± 0.04                       | 6.08 ± 0.08                       |
| Tertiary and<br>quaternary amine               | MP64        | 9.79 ± 0.04                    | 9.55 ± 0.47                       | 10.04 ± 0.02                      |
| Carboxylic with<br>amines                      | K3          | 4.34 ± 0.01                    | 4.76 ± 0.46                       | 4.41 ± 0.04                       |
|                                                | K5          | 4.91 ± 0.03                    | 5.11 ± 0.14                       | 5.14 ± 0.04                       |
| Sulphonic                                      | C150        | 7.07 ± 0.02                    | 7.10 ± 0.01                       | 7.05 ± 0.21                       |
|                                                | C160        | 7.00 ± 0.04                    | 7.06 ± 0.03                       | 7.17 ± 0.07                       |
|                                                | K2629       | 0.56 ± 0.01                    | 0.59 ± 0.01                       | 0.62 ± 0.01                       |
|                                                | S100        | 3.19 ± 0.03                    | 3.20 ± 0.01                       | 3.19 ± 0.02                       |
| Phosphonic and<br>sulphonic                    | S957        | 0.90 ± 0.02                    | 0.87 ± 0.08                       | 1.00 ± 0.01                       |
| Aminophosphonic                                | S940        | 7.24 ± 0.01                    | 6.90 ± 0.67                       | 7.59 ± 0.04                       |
|                                                | IRC747      | 9.33 ± 0.00                    | 9.73 ± 0.02                       | 9.73 ± 0.37                       |
| Bis-(2,4,4-<br>trimethylpentyl-)<br>phosphinic | MTX8010     | 3.76 ± 0.00                    | 4.14 ± 0.06                       | 4.11 ± 0.02                       |
| Iminodiacetic                                  | IRC748      | 9.05 ± 0.04                    | 9.26 ± 0.01                       | 9.27 ± 0.01                       |
|                                                | TP207       | 9.29 ± 0.01                    | 9.56 ± 0.04                       | 9.86 ± 0.01                       |
|                                                | S9320       | 9.46 ± 0.01                    | 9.73 ± 0.02                       | 9.62 ± 0.57                       |
|                                                | TP208       | 9.59 ± 0.00                    | 9.80 ± 0.01                       | 10.20 ± 0.01                      |
| N-<br>Methylglucamine                          | S108        | 9.22 ± 0.01                    | 9.25 ± 0.02                       | 9.29 ± 0.01                       |
|                                                | CRB03       | 9.43 ± 0.03                    | 9.45 ± 0.02                       | 9.45 ± 0.01                       |
|                                                | CRB05       | 9.46 ± 0.01                    | 9.49 ± 0.01                       | 9.58 ± 0.01                       |
| N-Methylpyridine                               | Sopolimer-8 | 7.55 ± 0.03                    | 7.59 ± 0.08                       | 7.38 ± 0.03                       |

*Table S2. Na sorption removal from the bitters after sorption stage with polymeric sorbents (1 h in contact with the sorbents).*

| Functional group                               | Sorbent     | Na sorption (%)                |                                   |                                   |
|------------------------------------------------|-------------|--------------------------------|-----------------------------------|-----------------------------------|
|                                                |             | Bittern 1<br>With Ca and<br>Mg | Bittern 2<br>Without Ca<br>and Mg | Bittern 3<br>Low<br>concentration |
| Tertiary amine                                 | IRA94       | <1                             | <1                                | <1                                |
|                                                | MP62        | <1                             | <1                                | <1                                |
|                                                | A100        | <1                             | <1                                | <1                                |
| Quaternary amine                               | A500Plus    | <1                             | <1                                | <1                                |
|                                                | MP500       | <1                             | <1                                | <1                                |
|                                                | K6362       | <1                             | <1                                | <1                                |
|                                                | IRA904      | <1                             | <1                                | <1                                |
| Tertiary and<br>quaternary amine               | MP64        | <1                             | <1                                | <1                                |
| Carboxylic with<br>amines                      | K3          | <1                             | <1                                | <1                                |
|                                                | K5          | <1                             | <1                                | <1                                |
| Sulphonic                                      | C150        | <1                             | <1                                | <1                                |
|                                                | C160        | <1                             | <1                                | <1                                |
|                                                | K2629       | 7.3 ± 0.7                      | 7.6 ± 1.7                         | 5.7 ± 0.7                         |
|                                                | S100        | <1                             | <1                                | <1                                |
| Phosphonic and<br>sulphonic                    | S957        | 2.7 ± 1.5                      | 5.0 ± 1.4                         | <1                                |
| Aminophosphonic                                | S940        | <1                             | <1                                | <1                                |
|                                                | IRC747      | <1                             | <1                                | <1                                |
| Bis-(2,4,4-<br>trimethylpentyl-)<br>phosphinic | MTX8010     | <1                             | <1                                | <1                                |
| Iminodiacetic                                  | IRC748      | <1                             | <1                                | <1                                |
|                                                | TP207       | <1                             | <1                                | <1                                |
|                                                | S9320       | <1                             | <1                                | <1                                |
|                                                | TP208       | <1                             | <1                                | <1                                |
| N-<br>Methylglucamine                          | S108        | <1                             | <1                                | <1                                |
|                                                | CRB03       | <1                             | <1                                | <1                                |
|                                                | CRB05       | <1                             | <1                                | <1                                |
| N-Methylpyridine                               | Sopolimer-8 | <1                             | <1                                | <1                                |
